# Supplementary material
Source: PubMed Central journal article supplement (PMC9160211)
Supplement: NIHMS1777516-supplement-Supplement_2.pdf [file NIHMS1777516-supplement-Supplement_2.pdf]

**Supplemental Material 2 – Relative abundance of contaminants in stool and control samples.**

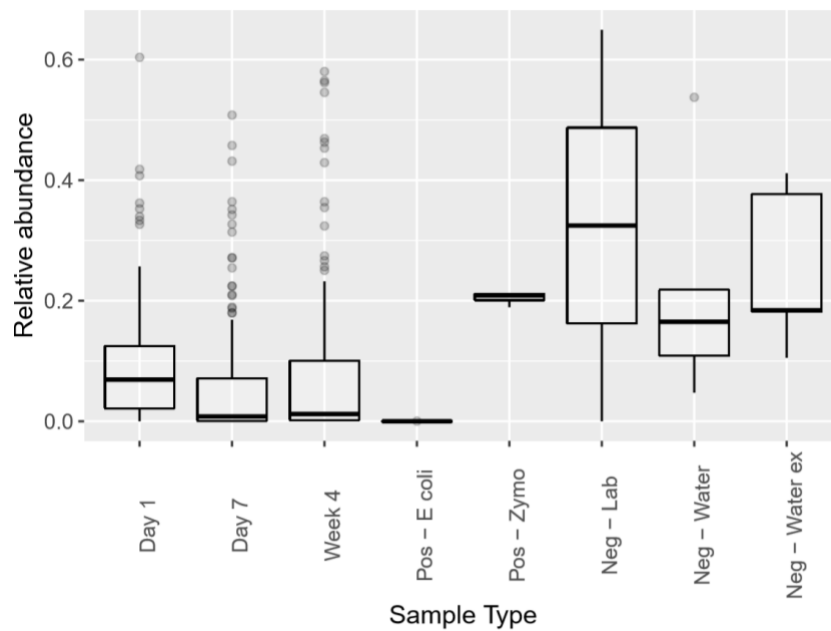

The boxplot (as in Fig. 3) shows the relative abundance of ASVs identified as contaminants using the decontam R package per time point together with control samples. There were relatively low levels of contaminants in the stool samples. Day 1 had a higher relative abundance of contaminants, which may reflect contamination from the hospital environment. The comparatively higher levels of contaminants in the negative controls were expected, as 100% of the ASVs identified in negative controls are theoretically contaminants. However, we opted for a more conservative rather than aggressive approach in contaminant identification to retain the bacterial information from the stool samples. Consequently, lower levels of contaminants in the negative controls were observed. We removed ASVs identified as contaminants and continued analysis with only the decontaminated data.
