# Supplementary material
Source: PubMed Central journal article supplement (PMC9160211)
Supplement: NIHMS1777516-supplement-Supplement_3.pdf [file NIHMS1777516-supplement-Supplement_3.pdf]

**Supplemental Material 3 - DNA concentrations in samples from babies who received dextrose gel, placebo gel or no prophylactic gel (control) collected on day 1, day 7 and week 4.**

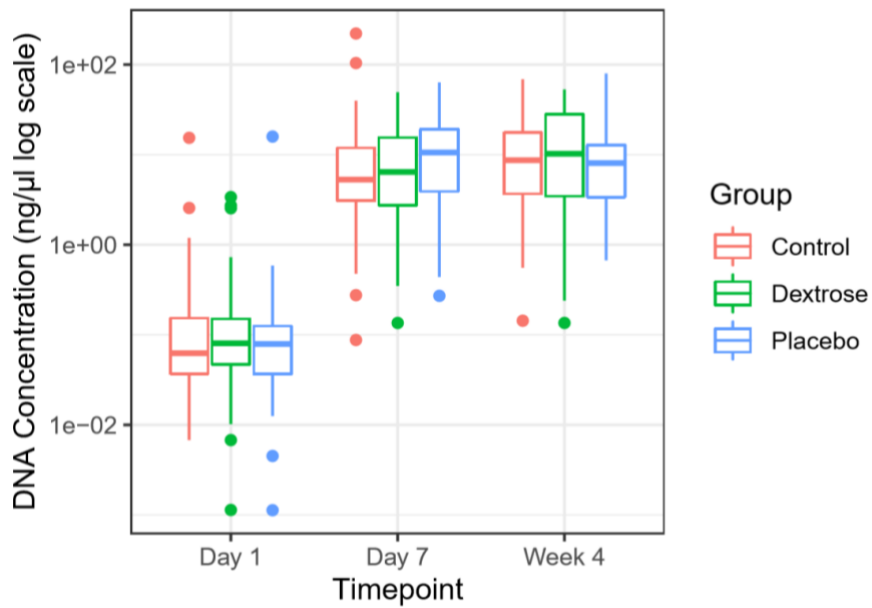

The boxplot (as in Fig. 3) shows two orders of magnitude lower DNA concentrations at day 1 compared to day 7 and week 4 (Kruskal-Wallis test; day 1 vs. day 7,  $p = 3.97e-47$ ; day 1 vs. week 4,  $p = 1.57e-43$ ; day 7 vs week 4,  $p = 0.313$ ).
