# Supplementary material
Source: PubMed Central journal article supplement (PMC9160211)
Supplement: NIHMS1777516-supplement-Supplement_4.pdf [file NIHMS1777516-supplement-Supplement_4.pdf]

## **Supplemental Material 4 - Significant Results of Genus Level Differences in Delivery Mode, Feeding and Ethnicity Covariates**

MaAsLin2 was used to detect differences in bacterial relative abundances at the genus level. 271 samples from day 7 and week 4 were included and 367 genera were tested for differential relative abundances with respect to delivery mode (vaginal vs caesarean), feeding (breastmilk only vs formula +/- breastmilk) and prioritised ethnicity (Māori vs Pacific vs Asian vs Indian vs Other vs European). The coefficient indicates the effect size and its sign indicates whether the bacterial genus had higher (positive value) or lower (negative value) relative abundance in the group in question (indicated by column Group) compared to the other group(s). The q-value column is the FDR-corrected p-value, and results where  $q < 0.05$  were deemed to be statistically significant.

### **Delivery Mode**

| Bacterial Genus             | Group   | Coefficient  | stderr      | p-value    | q-value  |
|-----------------------------|---------|--------------|-------------|------------|----------|
| Bacteroides                 | Vaginal | 1.484903407  | 0.203634231 | 1.6591E-11 | 3.87E-10 |
| Veillonella                 | Vaginal | -1.253444208 | 0.169624831 | 1.1466E-11 | 3.87E-10 |
| Enterococcus                | Vaginal | -1.185876636 | 0.175303033 | 2.874E-10  | 5.03E-09 |
| Parabacteroides             | Vaginal | 1.122927588  | 0.203390251 | 1.4605E-07 | 1.7E-06  |
| Clostridium.sensu.stricto.1 | Vaginal | -0.858362613 | 0.204326769 | 4.6431E-05 | 0.000271 |
| Haemophilus                 | Vaginal | -0.783794061 | 0.185905505 | 4.4766E-05 | 0.000271 |
| Bifidobacterium             | Vaginal | 0.791127616  | 0.210265292 | 0.00024204 | 0.001149 |
| Bilophila                   | Vaginal | 0.392406681  | 0.114290895 | 0.00076985 | 0.00317  |
| Collinsella                 | Vaginal | 0.50545358   | 0.152365647 | 0.0011386  | 0.004195 |
| Escherichia.Shigella        | Vaginal | 0.585687854  | 0.187399669 | 0.00213301 | 0.00711  |
| Sutterella                  | Vaginal | 0.470008583  | 0.156003883 | 0.00305191 | 0.009711 |
| Phascolarctobacterium       | Vaginal | 0.380632441  | 0.127310254 | 0.00324824 | 0.009886 |
| Eggerthella                 | Vaginal | 0.263232746  | 0.096847867 | 0.007318   | 0.019702 |
| Kluyvera                    | Vaginal | -0.195771517 | 0.073045253 | 0.00815054 | 0.021131 |

### **Feeding**

Note – exclusive formula & formula with breastmilk (combination) are collapsed into one group.

| Bacterial Genus | Group                  | coefficient | stderr   | p-value  | q-value  |
|-----------------|------------------------|-------------|----------|----------|----------|
| Staphylococcus  | Formula +/- breastmilk | -0.68361    | 0.101556 | 1.31E-10 | 4.58E-09 |
| Veillonella     | Formula +/- breastmilk | 0.776903    | 0.175114 | 1.34E-05 | 0.000221 |
| Gemella         | Formula +/- breastmilk | -0.50822    | 0.116521 | 1.96E-05 | 0.000221 |
| Haemophilus     | Formula +/- breastmilk | -0.48908    | 0.177596 | 0.006306 | 0.027591 |

### **Prioritized Ethnicity**

Note - Pacific ethnicity was included in Other due to low numbers.

| Bacterial Genus | Group  | coefficient | stderr   | p-value  | q-value     |
|-----------------|--------|-------------|----------|----------|-------------|
| Enterococcus    | Indian | 1.283086    | 0.285437 | 1.44E-05 | 0.000803774 |
| Veillonella     | Indian | 1.121731    | 0.293369 | 0.000198 | 0.003849457 |
