# Supplementary material
Source: PubMed Central journal article supplement (PMC9160211)
Supplement: NIHMS1777516-supplement-Supplement_5.pdf [file NIHMS1777516-supplement-Supplement_5.pdf]

**Supplemental Material 5 – Hierarchical clustering of the day 7 and week 4 stool samples (relative abundances of bacterial classes) using the complete linkage method.**

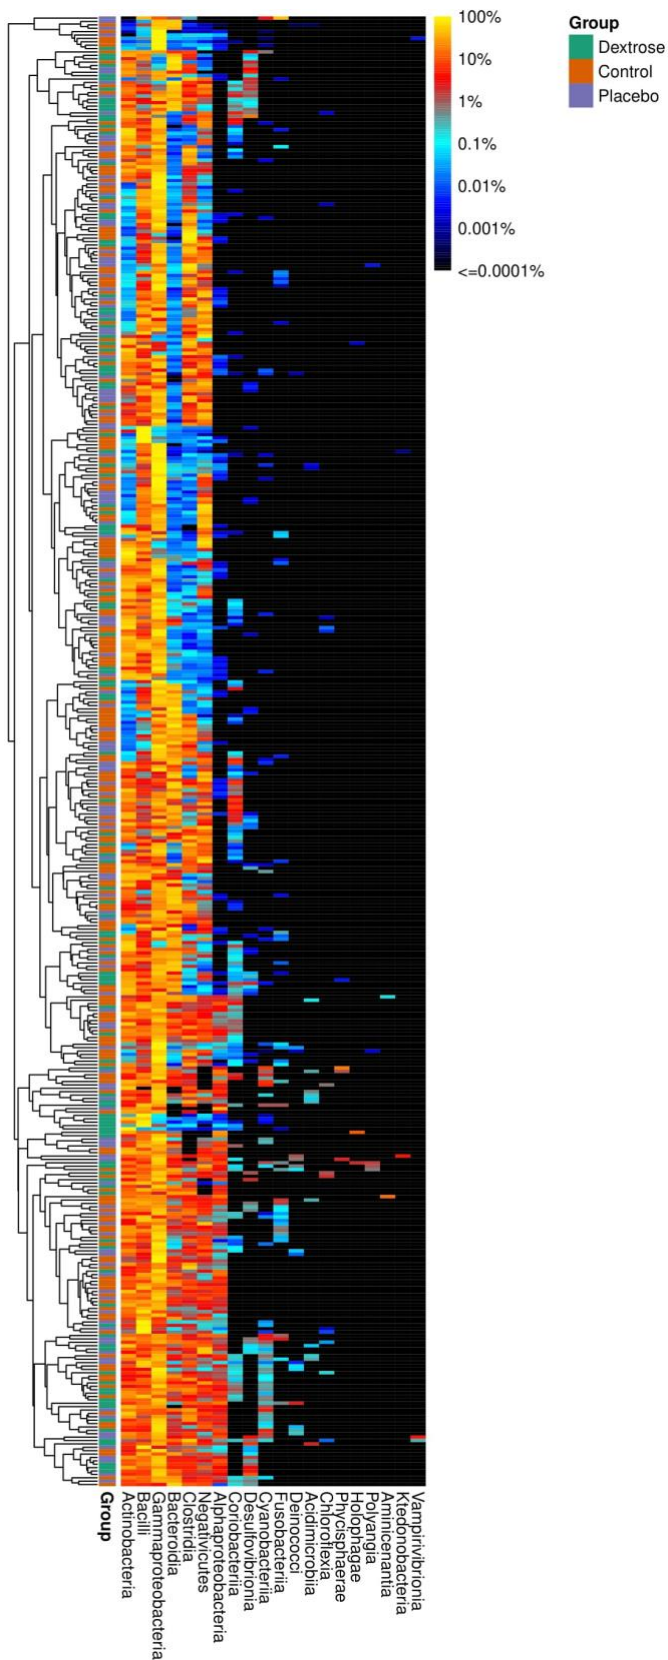

The heatmap shows that most samples harboured high abundance of typical neonatal gut taxa; Actinobacteria, Bacilli, Gammaproteobacteria, Bacteroidia, Clostridia and Negativicutes. The clustering was, however, not associated with study groups. Participants from different study groups appeared to co-occur within clusters randomly.
